# Supplementary material
Source: MDPI journal article supplement (https://www.mdpi.com/2073-445X/13/5/650)
Supplement: s1 [file s1]

**Table S1.** Drivers of the LULC changes in Nordul Gorjului de Vest Natura 2000 site

|                  | Acronyms | Drivers                              | Units | Spatial resolution                | Source    |
|------------------|----------|--------------------------------------|-------|-----------------------------------|-----------|
| Climatic drivers | bio1     | Annual mean temperature              | °C    | 10 minutes(~340 km <sup>2</sup> ) | WorldClim |
|                  | bio2     | Annual mean diurnal range            | °C    | 10 minutes(~340 km <sup>2</sup> ) | WorldClim |
|                  | bio3     | Isothermality                        | %     | 10 minutes(~340 km <sup>2</sup> ) | WorldClim |
|                  | bio4     | Temperature seasonality              | °C    | 10 minutes(~340 km <sup>2</sup> ) | WorldClim |
|                  | bio5     | Maximum temperature of warmest month | °C    | 10 minutes(~340 km <sup>2</sup> ) | WorldClim |
|                  | bio6     | Minimum temperature of coldest month | °C    | 10 minutes(~340 km <sup>2</sup> ) | WorldClim |
|                  | bio7     | Temperature annual range             | °C    | 10 minutes(~340 km <sup>2</sup> ) | WorldClim |
|                  | bio8     | Mean temperature of wettest quarter  | °C    | 10 minutes(~340 km <sup>2</sup> ) | WorldClim |
|                  | bio9     | Mean temperature of driest quarter   | °C    | 10 minutes(~340 km <sup>2</sup> ) | WorldClim |
|                  | bio10    | Mean temperature of warmest quarter  | °C    | 10 minutes(~340 km <sup>2</sup> ) | WorldClim |
|                  | bio11    | Mean temperature of coldest quarter  | °C    | 10 minutes(~340 km <sup>2</sup> ) | WorldClim |
|                  | bio12    | Annual precipitation                 | mm    | 10 minutes(~340 km <sup>2</sup> ) | WorldClim |
|                  | bio13    | Precipitation of wettest month       | mm    | 10 minutes(~340 km <sup>2</sup> ) | WorldClim |
|                  | bio14    | Precipitation of driest month        | mm    | 10 minutes(~340 km <sup>2</sup> ) | WorldClim |
|                  | bio15    | Precipitation seasonality            | %     | 10 minutes(~340 km <sup>2</sup> ) | WorldClim |
|                  | bio16    | Precipitation of wettest             | mm    | 10 minutes(~340                   | WorldClim |

|                       |              |                                                                  |                            |                                   |                                                                                                         |
|-----------------------|--------------|------------------------------------------------------------------|----------------------------|-----------------------------------|---------------------------------------------------------------------------------------------------------|
|                       |              | quarter                                                          |                            | km <sup>2</sup> )                 |                                                                                                         |
|                       | bio17        | Precipitation of driest quarter)                                 | mm                         | 10 minutes(~340 km <sup>2</sup> ) | WorldClim                                                                                               |
|                       | bio18        | Precipitation of warmest quarter                                 | mm                         | 10 minutes(~340 km <sup>2</sup> ) | WorldClim                                                                                               |
|                       | bio19        | Precipitation of coldest quarter                                 | mm                         | 10 minutes(~340 km <sup>2</sup> ) | WorldClim                                                                                               |
| Biophysical drivers   | elevation    | Elevation                                                        | meters                     | 250 m                             | SRTM Data                                                                                               |
|                       | aspect       | Aspect                                                           | degree                     | 250 m                             | SRTM Data                                                                                               |
|                       | slope        | Slope                                                            | degree                     | 250 m                             | SRTM Data                                                                                               |
|                       | nitrogen     | Nitrogen                                                         | cg/kg                      | 250 m                             | SoilGrids                                                                                               |
|                       | soil_carbon  | Soil organic carbon stock                                        | t/ha                       | 250 m                             | SoilGrids                                                                                               |
|                       | Soil ph      | Soil pH in water                                                 | pH*10                      | 250 m                             | SoilGrids                                                                                               |
| Location drivers      | Water euclid | Euclidean distance to nearest water bodies across the study site | meters                     | 100 m                             | ArcMap processing based on vector layer of distribution of water courses at the level of the study area |
|                       | Roads euclid | Euclidean distance to nearest roads across the study site        | meters                     | 100 m                             | ArcMap processing based on vector layer of distribution of roads at the level of the study area         |
| Anthropogenic drivers | Pop dens     | Population density                                               | Gridded population density | ~ 1 km <sup>2</sup>               | WorldPop                                                                                                |

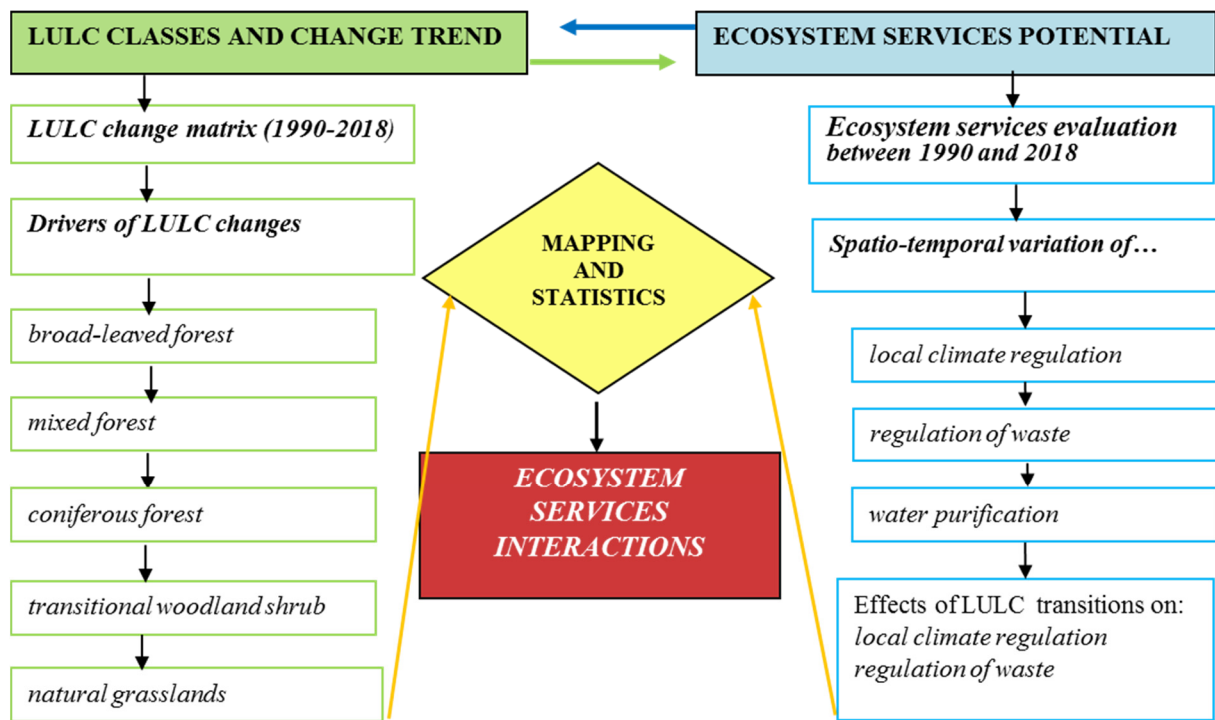

**Figure S1.** Flowchart diagram of methodological approach.

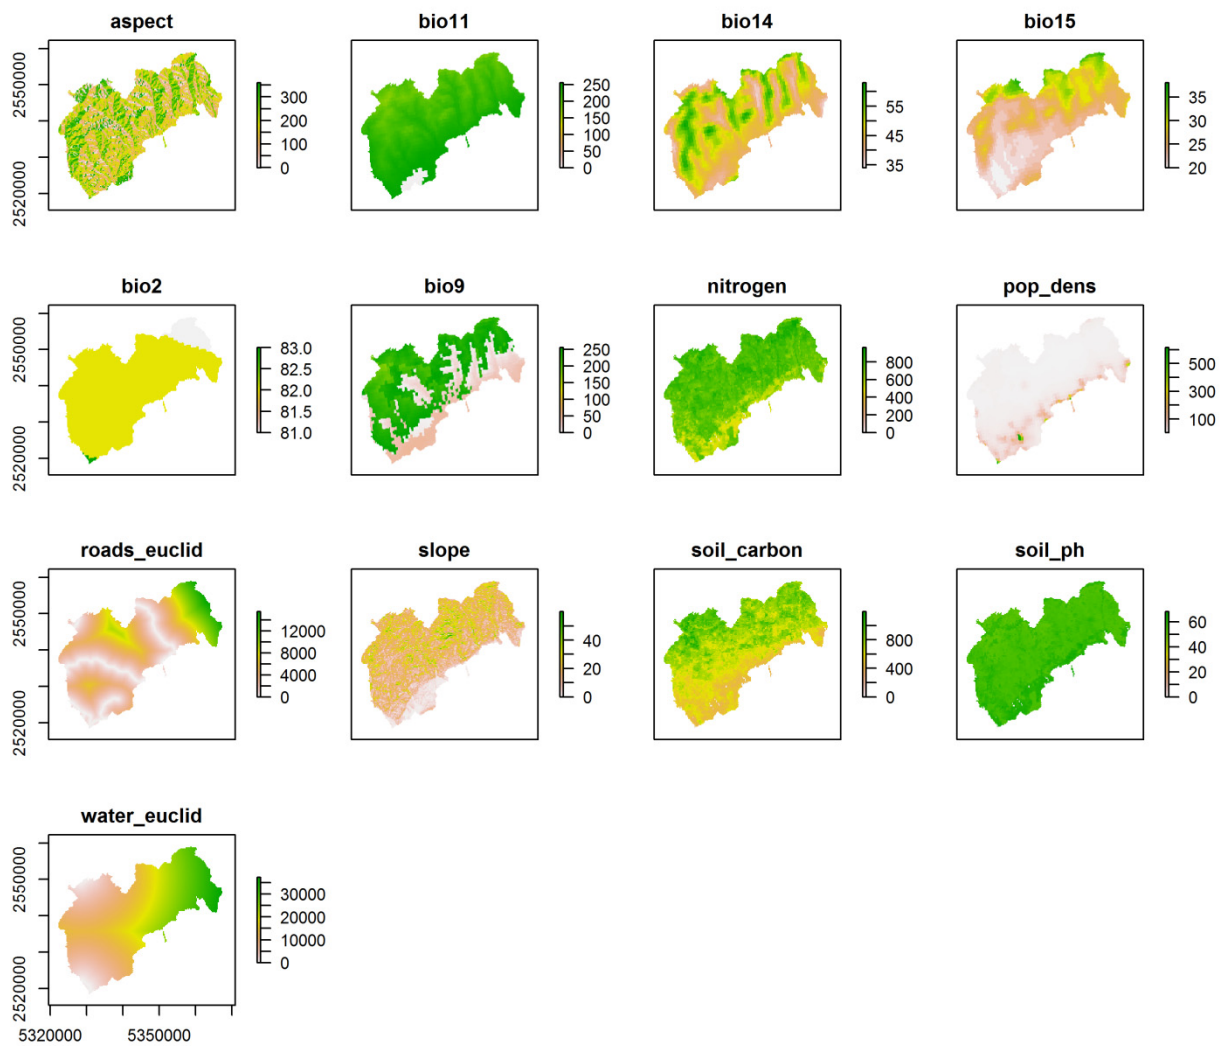

**Figure S2.** Maps of the predictors used in logistic regression analysis

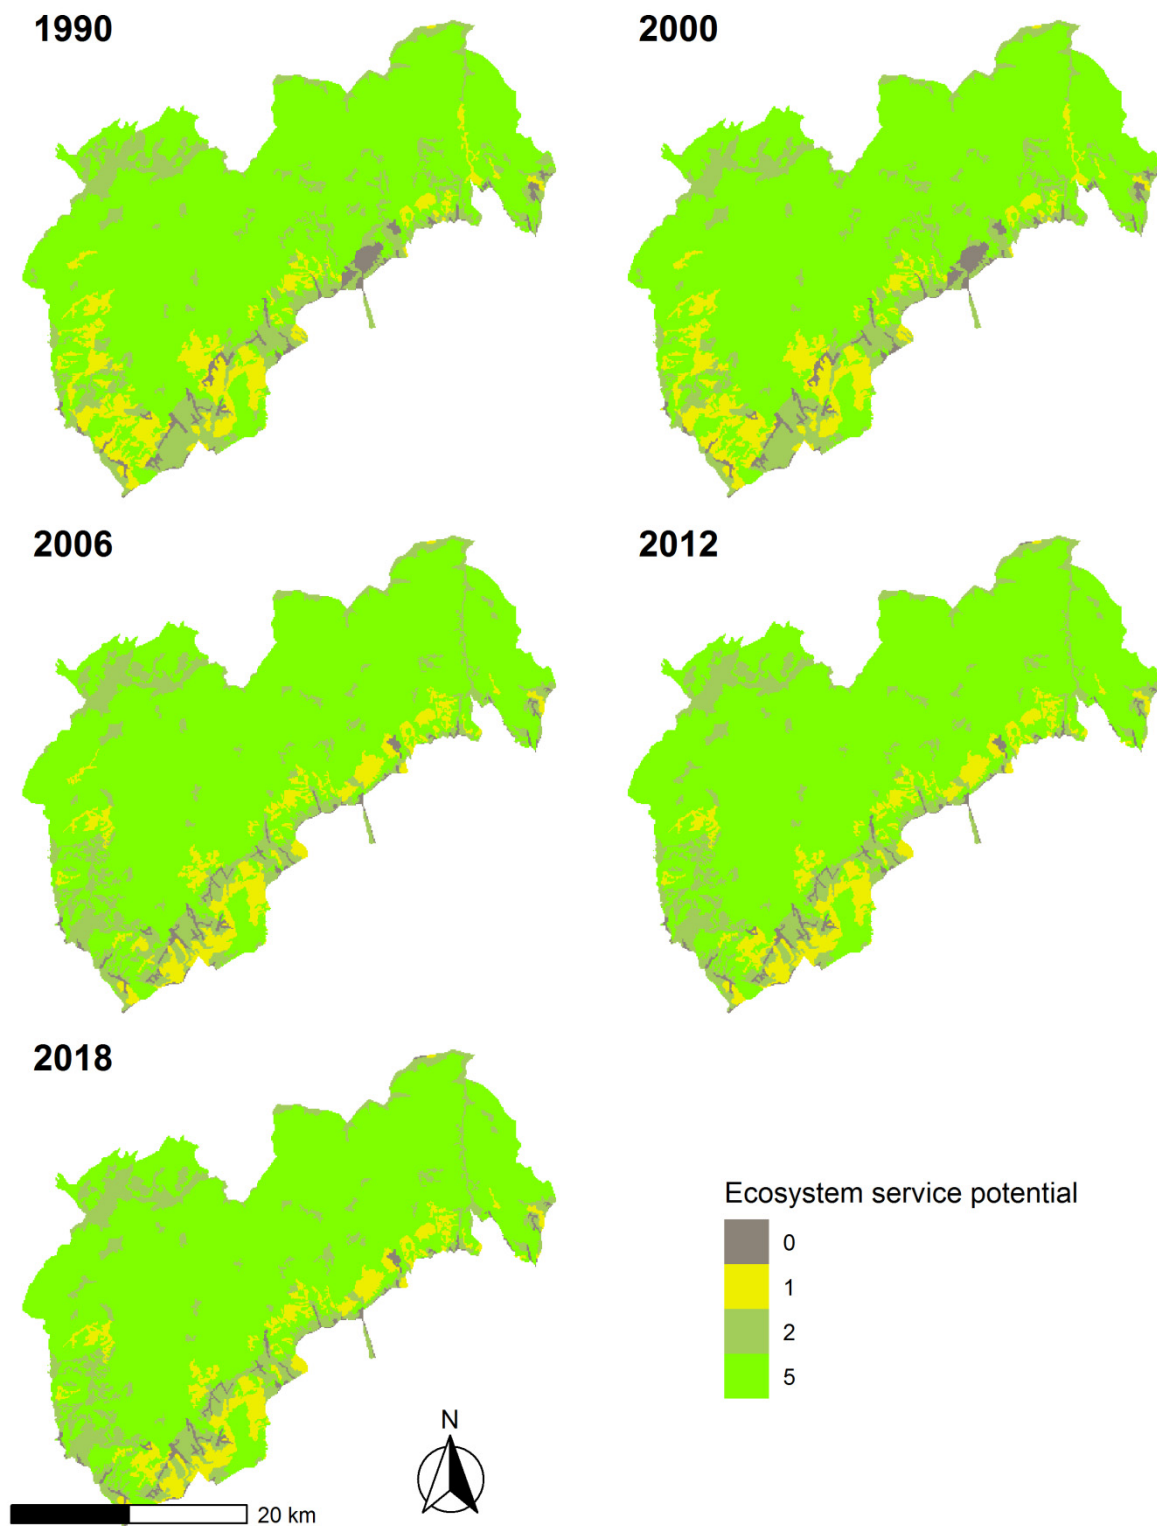

**Figure S3.** Maps of the local climate regulation ecosystem service from 1990 to 2018 in Nordul Gorjului de Vest Natura 2000 site. See methods for scale of the ES potential.

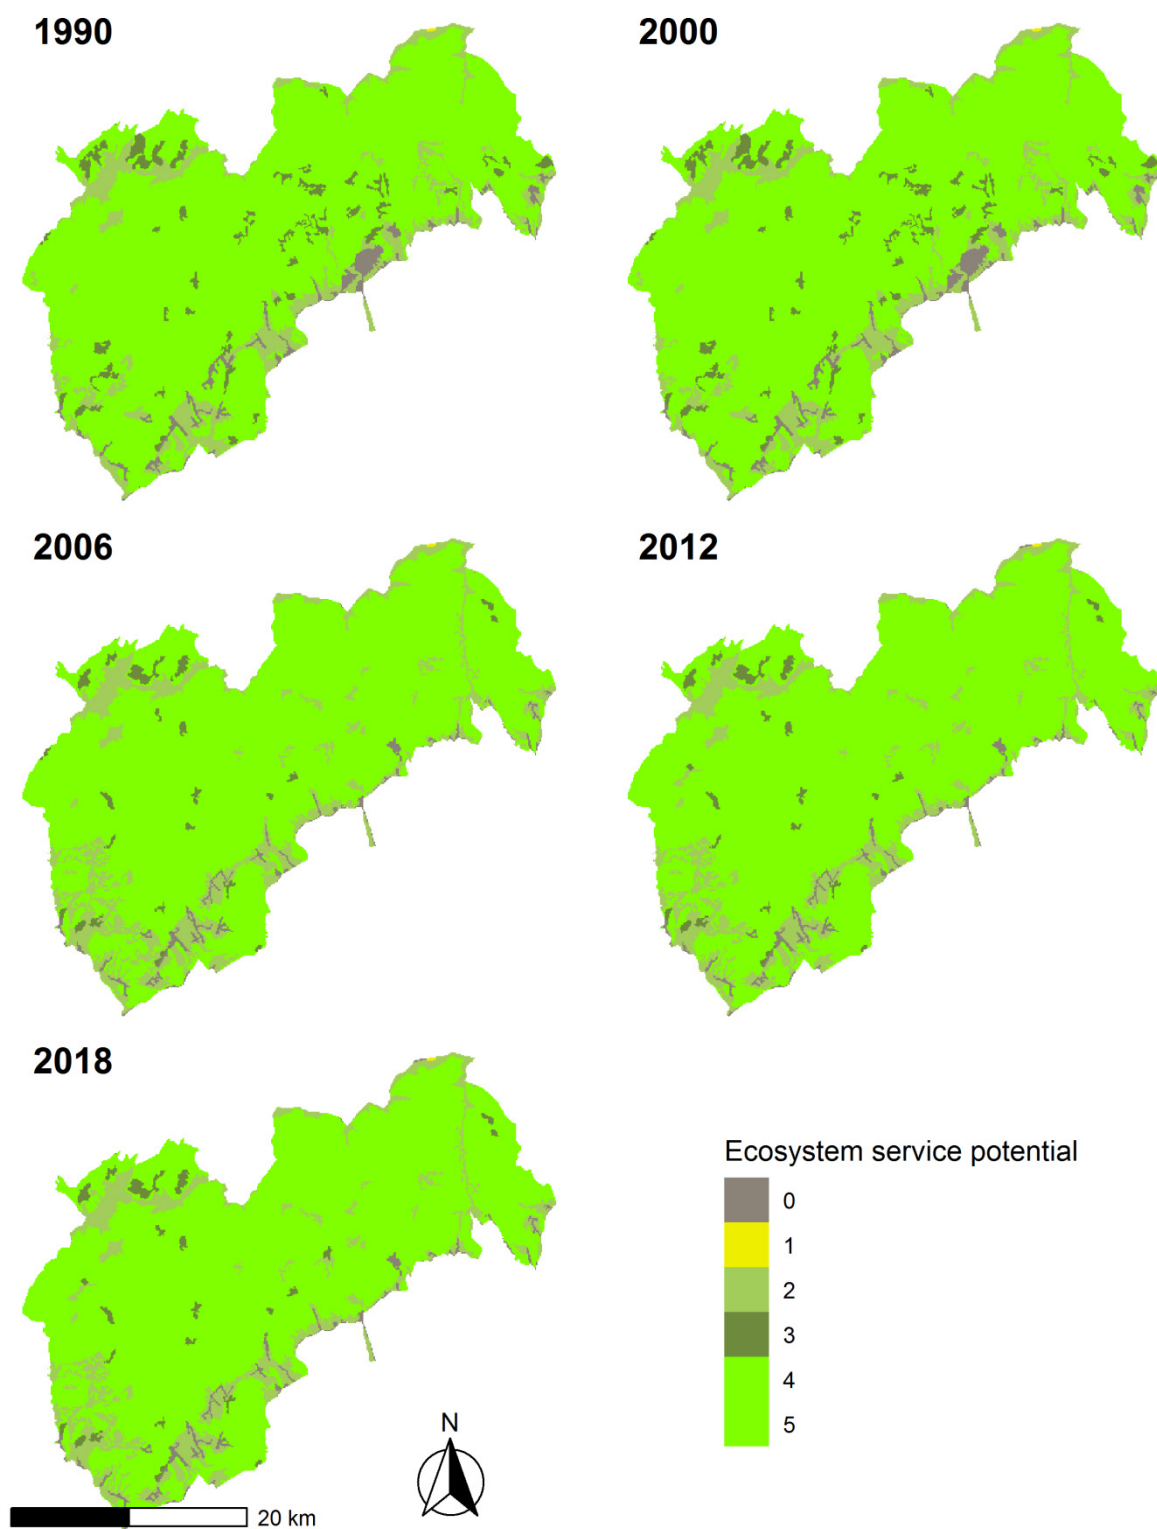

**Figure S4.** Maps of the regulation of waste ecosystem service from 1990 to 2018 in Nordul Gorjului de Vest Natura 2000 site. See methods for scale of the ES potential.

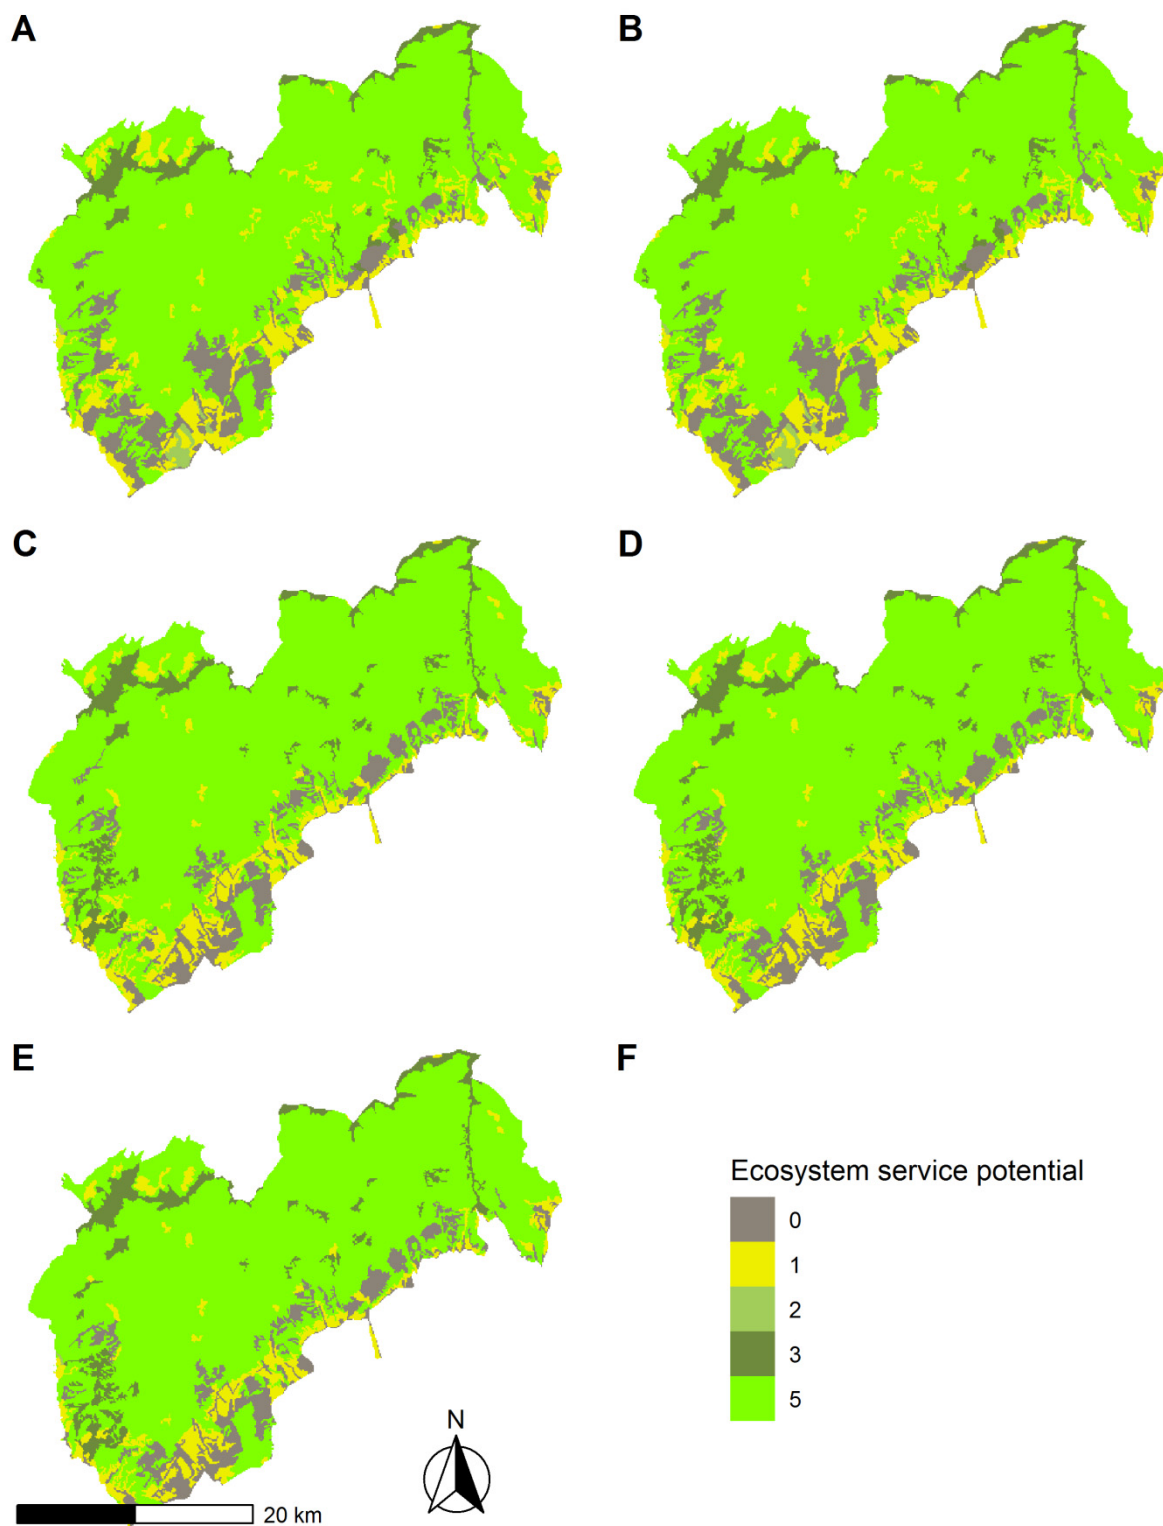

**Figure S5.** Maps of the water purification ecosystem service from 1990 to 2018 in Nordul Gorjului de Vest Natura 2000 site. See methods for scale of the ES potential.

**Table S2.** Correlation matrix between remaining LULC drivers after excluding the collinear variables

[illegible]



**Table S3.** Pairwise interactions between ecosystem services for overall study period (1990-2018). For synergy and dis-synergy interactions are indicated also the area where the three ES increase or decrease together. ES1- local climate regulation; ES2- regulation of waste; ES3-water purification.

| Interactions between ecosystem services |                                                                                                                                          |
|-----------------------------------------|------------------------------------------------------------------------------------------------------------------------------------------|
| Synergy (win-win)                       | ES1-ES2: 40.51 km <sup>2</sup><br>ES1-ES3: 67.24 km <sup>2</sup><br>ES2-ES3: 35.53 km <sup>2</sup><br>ES1-ES2-ES3: 35.53 km <sup>2</sup> |
| Trade-off (positive/negative)           | ES1-ES2: 23.33 km <sup>2</sup><br>ES1-ES3: 0 km <sup>2</sup><br>ES2-ES3: 10.7 km <sup>2</sup>                                            |
| Trade-off (negative/positive)           | ES1-ES2: 10.7 km <sup>2</sup><br>ES1-ES3: 0 km <sup>2</sup><br>ES2-ES3: 27.65 km <sup>2</sup>                                            |
| Dis-synergy (lose-lose)                 | ES1-ES2: 13.18 km <sup>2</sup><br>ES1-ES3: 24.9 km <sup>2</sup><br>ES2-ES3: 14.11 km <sup>2</sup><br>ES1-ES2-ES3: 13.1 km <sup>2</sup>   |
